# Supplementary material
Source: publisher figshare collection journal article supplement (https://acs.figshare.com/ndownloader/files/4577407)
Supplement: Supplementary file 1 [file 4577407]

 
data_3,9-DPh-PXX

_publ_requested_journal          'Journal of American Chemical Society'

_publ_contact_author_name        'Norihito Kobayashi'

_publ_contact_author_address     
'FDL, AML, Sony Corporation, Atsugi, 243-0021, Japan'

_publ_contact_author_email       Norihito.Kobayashi@jp.sony.com

_publ_contact_author_phone       '+81 46 226 3349'

_publ_contact_author_fax         '+81 46 226 2369'
loop_
_publ_author_name
_publ_author_address
'Kobayashi, Norihito' 'FDL, AML, Sony Corporation, Atsugi, 243-0021, Japan'
'Sasaki, Mari' 'FDL, AML, Sony Corporation, Atsugi, 243-0021, Japan'
'Nomoto, Kazumasa' 'FDL, AML, Sony Corporation, Atsugi, 243-0021, Japan'
'Kasahara, Jiro' 'FDL, AML, Sony Corporation, Atsugi, 243-0021, Japan'

_audit_creation_method           SHELXL-97

_publ_section_title              'A Stable peri-Xanthenoxanthene Thin-Film Transistor with Efficient Carrier Injection'

_publ_section_abstract           
;
The thin-film transistor devices utilized 3,9-diphenyl-peri-xanthenoxanthene (3,9-DPh-PXX) showed 
p-type field-effect transistor characteristics and stability against oxygen, moisture, 
and high temperature annealing in the air.
;


#----------------------------------------------------------------------------#
#                   CHEMICAL INFORMATION                                     #
#----------------------------------------------------------------------------#

_chemical_name_systematic        
; 
?
;
_chemical_name_common            
; 
3, 9-diphenyl-6, 12-dioxaanthanthrene
;
_chemical_formula_moiety         'C32 H18 O2'
_chemical_formula_sum            'C32 H18 O2'
_chemical_formula_weight         434.46

loop_
_atom_type_symbol
_atom_type_description
_atom_type_scat_dispersion_real
_atom_type_scat_dispersion_imag
_atom_type_scat_source
C C 0.0033 0.0016 'International Tables Vol C Tables 4.2.6.8 and 6.1.1.4'
H H 0.0000 0.0000 'International Tables Vol C Tables 4.2.6.8 and 6.1.1.4'
O O 0.0106 0.0060 'International Tables Vol C Tables 4.2.6.8 and 6.1.1.4'

#----------------------------------------------------------------------------#
#                   UNIT CELL INFORMATION                                    #
#----------------------------------------------------------------------------#

_symmetry_cell_setting           orthorhombic
_symmetry_space_group_name_H-M   Pccn

loop_
_symmetry_equiv_pos_as_xyz
'x, y, z'
'x+1/2, -y, -z+1/2'
'-x, y+1/2, -z+1/2'
'-x+1/2, -y+1/2, z'
'-x, -y, -z'
'-x-1/2, y, z-1/2'
'x, -y-1/2, z-1/2'
'x-1/2, y-1/2, -z'

_cell_length_a                   15.920(2)
_cell_length_b                   18.508(3)
_cell_length_c                   6.9299(9)
_cell_angle_alpha                90.00
_cell_angle_beta                 90.00
_cell_angle_gamma                90.00
_cell_volume                     2041.9(5)
_cell_formula_units_Z            4
_cell_measurement_temperature    298
_cell_measurement_reflns_used    ?
_cell_measurement_theta_min      ?
_cell_measurement_theta_max      ?

_exptl_crystal_description       needle
_exptl_crystal_colour            yellow
_exptl_crystal_size_max          0.2
_exptl_crystal_size_mid          0.1
_exptl_crystal_size_min          0.01
_exptl_crystal_density_diffrn    1.413
_exptl_crystal_F_000             904
_exptl_absorpt_coefficient_mu    0.087

_exptl_special_details           
; 
 ? 
;

_diffrn_ambient_temperature      293(2)
_diffrn_radiation_wavelength     0.71073
_diffrn_radiation_type           MoK\a
_diffrn_radiation_source         'fine-focus sealed tube'
_diffrn_radiation_monochromator  graphite
_diffrn_reflns_number            10893
_diffrn_reflns_av_R_equivalents  0.0793
_diffrn_reflns_av_sigmaI/netI    0.0580
_diffrn_reflns_limit_h_min       -20
_diffrn_reflns_limit_h_max       19
_diffrn_reflns_limit_k_min       -20
_diffrn_reflns_limit_k_max       24
_diffrn_reflns_limit_l_min       -9
_diffrn_reflns_limit_l_max       8
_diffrn_reflns_theta_min         1.69
_diffrn_reflns_theta_max         27.55
_reflns_number_total             2338
_reflns_number_gt                994
_reflns_threshold_expression     >2sigma(I)


_computing_structure_solution    'SHELXS-97 (Sheldrick, 1990)'
_computing_structure_refinement  'SHELXL-97 (Sheldrick, 1997)'


_refine_special_details          
; 
 Refinement of F^2^ against ALL reflections.  The weighted R-factor wR and 
 goodness of fit S are based on F^2^, conventional R-factors R are based 
 on F, with F set to zero for negative F^2^. The threshold expression of 
 F^2^ > 2sigma(F^2^) is used only for calculating R-factors(gt) etc. and is 
 not relevant to the choice of reflections for refinement.  R-factors based 
 on F^2^ are statistically about twice as large as those based on F, and R- 
 factors based on ALL data will be even larger. 
;

_refine_ls_structure_factor_coef Fsqd
_refine_ls_matrix_type           full
_refine_ls_weighting_scheme      calc
_refine_ls_weighting_details     
'calc w=1/[\s^2^(Fo^2^)+(0.0575P)^2^+0.0000P] where P=(Fo^2^+2Fc^2^)/3'
_atom_sites_solution_primary     direct
_atom_sites_solution_secondary   difmap
_atom_sites_solution_hydrogens   geom
_refine_ls_hydrogen_treatment    mixed
_refine_ls_extinction_method     SHELXL
_refine_ls_extinction_coef       0.0020(6)
_refine_ls_extinction_expression Fc^*^=kFc[1+0.001xFc^2^\l^3^/sin(2\q)]^-1/4^
_refine_ls_number_reflns         2338
_refine_ls_number_parameters     155
_refine_ls_number_restraints     0
_refine_ls_R_factor_all          0.1448
_refine_ls_R_factor_gt           0.0505
_refine_ls_wR_factor_ref         0.1431
_refine_ls_wR_factor_gt          0.1080
_refine_ls_goodness_of_fit_ref   0.974
_refine_ls_restrained_S_all      0.974
_refine_ls_shift/su_max          0.000
_refine_ls_shift/su_mean         0.000

loop_
_atom_site_label
_atom_site_type_symbol
_atom_site_fract_x
_atom_site_fract_y
_atom_site_fract_z
_atom_site_U_iso_or_equiv
_atom_site_adp_type
_atom_site_occupancy
_atom_site_symmetry_multiplicity
_atom_site_calc_flag
_atom_site_refinement_flags
_atom_site_disorder_assembly
_atom_site_disorder_group
O1 O 0.40698(9) 0.26641(8) 0.1472(2) 0.0518(5) Uani 1 1 d . . .
C1 C 0.04021(15) 0.35234(14) 0.1558(4) 0.0523(7) Uani 1 1 d . . .
C2 C 0.05322(15) 0.42706(14) 0.1652(4) 0.0530(7) Uani 1 1 d . . .
C3 C 0.13175(15) 0.45844(13) 0.1664(3) 0.0466(6) Uani 1 1 d . . .
C4 C 0.28921(14) 0.43473(14) 0.1614(3) 0.0467(7) Uani 1 1 d . . .
C5 C 0.35467(14) 0.38726(13) 0.1578(3) 0.0481(6) Uani 1 1 d . . .
C6 C 0.20356(14) 0.41172(13) 0.1582(3) 0.0420(6) Uani 1 1 d . . .
C7 C 0.33890(13) 0.31332(13) 0.1501(3) 0.0424(6) Uani 1 1 d . . .
C8 C 0.10778(14) 0.30787(13) 0.1525(3) 0.0445(6) Uani 1 1 d . . .
C9 C 0.25844(13) 0.28802(11) 0.1478(3) 0.0391(6) Uani 1 1 d . . .
C10 C 0.18994(14) 0.33631(13) 0.1519(3) 0.0404(6) Uani 1 1 d . . .
C11 C 0.13795(15) 0.53834(13) 0.1830(3) 0.0464(6) Uani 1 1 d . . .
C12 C 0.09366(14) 0.57465(14) 0.3260(4) 0.0543(7) Uani 1 1 d . . .
C13 C 0.09453(16) 0.64938(16) 0.3377(4) 0.0645(8) Uani 1 1 d . . .
C14 C 0.14062(16) 0.68916(16) 0.2086(5) 0.0673(9) Uani 1 1 d . . .
C15 C 0.18502(15) 0.57998(14) 0.0554(4) 0.0553(7) Uani 1 1 d . . .
C16 C 0.18632(16) 0.65435(15) 0.0680(4) 0.0637(8) Uani 1 1 d . . .
H1 H -0.0139 0.3335 0.1520 0.063 Uiso 1 1 calc R . .
H2 H 0.0065 0.4571 0.1708 0.064 Uiso 1 1 calc R . .
H4 H 0.3007 0.4840 0.1660 0.056 Uiso 1 1 calc R . .
H5 H 0.4096 0.4042 0.1605 0.058 Uiso 1 1 calc R . .
H12 H 0.0628 0.5483 0.4156 0.065 Uiso 1 1 calc R . .
H13 H 0.0638 0.6726 0.4334 0.077 Uiso 1 1 calc R . .
H14 H 0.1410 0.7393 0.2161 0.081 Uiso 1 1 calc R . .
H15 H 0.2182 0.6811 -0.0189 0.076 Uiso 1 1 calc R . .
H16 H 0.2163 0.5572 -0.0403 0.066 Uiso 1 1 calc R . .

loop_
_atom_site_aniso_label
_atom_site_aniso_U_11
_atom_site_aniso_U_22
_atom_site_aniso_U_33
_atom_site_aniso_U_23
_atom_site_aniso_U_13
_atom_site_aniso_U_12
O1 0.0339(9) 0.0535(12) 0.0682(12) -0.0016(9) 0.0024(9) -0.0014(8)
C1 0.0356(13) 0.0610(18) 0.0603(17) 0.0036(14) -0.0011(13) -0.0022(12)
C2 0.0398(13) 0.0586(18) 0.0604(18) 0.0007(14) 0.0006(14) 0.0057(13)
C3 0.0424(14) 0.0558(17) 0.0416(15) 0.0006(12) -0.0024(13) 0.0012(13)
C4 0.0404(13) 0.0533(17) 0.0465(16) -0.0057(13) 0.0047(12) -0.0082(12)
C5 0.0347(12) 0.0597(18) 0.0498(16) -0.0033(13) 0.0028(12) -0.0049(13)
C6 0.0384(12) 0.0521(16) 0.0356(14) -0.0001(12) 0.0015(12) -0.0033(11)
C7 0.0348(13) 0.0529(17) 0.0396(15) -0.0004(12) 0.0018(11) 0.0012(12)
C8 0.0381(13) 0.0514(16) 0.0441(16) 0.0016(12) -0.0025(12) -0.0043(12)
C9 0.0346(12) 0.0515(14) 0.0313(13) -0.0006(11) 0.0020(12) -0.0018(12)
C10 0.0368(13) 0.0527(16) 0.0317(14) 0.0009(12) -0.0020(12) -0.0034(12)
C11 0.0382(13) 0.0534(17) 0.0475(16) -0.0028(13) -0.0029(13) 0.0017(12)
C12 0.0406(14) 0.0644(19) 0.0578(18) -0.0021(15) 0.0027(14) 0.0069(13)
C13 0.0471(15) 0.067(2) 0.079(2) -0.0177(17) 0.0032(16) 0.0088(14)
C14 0.0522(16) 0.057(2) 0.093(2) -0.0083(17) -0.0114(17) 0.0049(16)
C15 0.0525(16) 0.0565(18) 0.0570(19) -0.0036(14) 0.0035(14) 0.0027(14)
C16 0.0583(17) 0.058(2) 0.075(2) 0.0065(16) 0.0026(17) -0.0014(15)

_geom_special_details            
; 
 All esds (except the esd in the dihedral angle between two l.s. planes) 
 are estimated using the full covariance matrix.  The cell esds are taken 
 into account individually in the estimation of esds in distances, angles 
 and torsion angles; correlations between esds in cell parameters are only 
 used when they are defined by crystal symmetry.  An approximate (isotropic) 
 treatment of cell esds is used for estimating esds involving l.s. planes. 
;

loop_
_geom_bond_atom_site_label_1
_geom_bond_atom_site_label_2
_geom_bond_distance
_geom_bond_site_symmetry_2
_geom_bond_publ_flag
O1 C7 1.389(2) . ?
O1 C8 1.395(3) 4 ?
C14 C13 1.371(4) . ?
C14 C16 1.376(4) . ?
C14 H14 0.9300 . ?
C13 C12 1.386(3) . ?
C13 H13 0.9300 . ?
C16 C15 1.379(3) . ?
C16 H15 0.9300 . ?
C15 C11 1.392(3) . ?
C15 H16 0.9300 . ?
C12 C11 1.390(3) . ?
C12 H12 0.9300 . ?
C2 C3 1.379(3) . ?
C2 C1 1.400(3) . ?
C2 H2 0.9300 . ?
C1 C8 1.355(3) . ?
C1 H1 0.9300 . ?
C5 C4 1.363(3) . ?
C5 C7 1.392(3) . ?
C5 H5 0.9300 . ?
C4 C6 1.429(3) . ?
C4 H4 0.9300 . ?
C11 C3 1.487(3) . ?
C3 C6 1.435(3) . ?
C8 O1 1.395(3) 4 ?
C8 C10 1.410(3) . ?
C7 C9 1.364(3) . ?
C6 C10 1.413(3) . ?
C10 C9 1.410(3) . ?
C9 C9 1.433(4) 4 ?

loop_
_geom_angle_atom_site_label_1
_geom_angle_atom_site_label_2
_geom_angle_atom_site_label_3
_geom_angle
_geom_angle_site_symmetry_1
_geom_angle_site_symmetry_3
_geom_angle_publ_flag
C7 O1 C8 118.96(17) . 4 ?
C13 C14 C16 119.6(3) . . ?
C13 C14 H14 120.2 . . ?
C16 C14 H14 120.2 . . ?
C14 C13 C12 120.2(3) . . ?
C14 C13 H13 119.9 . . ?
C12 C13 H13 119.9 . . ?
C14 C16 C15 120.3(3) . . ?
C14 C16 H15 119.9 . . ?
C15 C16 H15 119.9 . . ?
C16 C15 C11 121.4(3) . . ?
C16 C15 H16 119.3 . . ?
C11 C15 H16 119.3 . . ?
C13 C12 C11 121.3(3) . . ?
C13 C12 H12 119.4 . . ?
C11 C12 H12 119.4 . . ?
C3 C2 C1 123.4(2) . . ?
C3 C2 H2 118.3 . . ?
C1 C2 H2 118.3 . . ?
C8 C1 C2 118.9(2) . . ?
C8 C1 H1 120.5 . . ?
C2 C1 H1 120.5 . . ?
C4 C5 C7 119.8(2) . . ?
C4 C5 H5 120.1 . . ?
C7 C5 H5 120.1 . . ?
C5 C4 C6 122.5(2) . . ?
C5 C4 H4 118.8 . . ?
C6 C4 H4 118.8 . . ?
C12 C11 C15 117.3(2) . . ?
C12 C11 C3 120.2(2) . . ?
C15 C11 C3 122.5(2) . . ?
C2 C3 C6 117.9(2) . . ?
C2 C3 C11 118.7(2) . . ?
C6 C3 C11 123.4(2) . . ?
C1 C8 O1 117.7(2) . 4 ?
C1 C8 C10 120.7(2) . . ?
O1 C8 C10 121.6(2) 4 . ?
C9 C7 O1 121.2(2) . . ?
C9 C7 C5 120.5(2) . . ?
O1 C7 C5 118.32(19) . . ?
C10 C6 C4 116.2(2) . . ?
C10 C6 C3 118.3(2) . . ?
C4 C6 C3 125.5(2) . . ?
C8 C10 C9 118.7(2) . . ?
C8 C10 C6 120.7(2) . . ?
C9 C10 C6 120.5(2) . . ?
C7 C9 C10 120.6(2) . . ?
C7 C9 C9 120.9(3) . 4 ?
C10 C9 C9 118.5(2) . 4 ?

_diffrn_measured_fraction_theta_max 0.993
_diffrn_reflns_theta_full        27.55
_diffrn_measured_fraction_theta_full 0.993
_refine_diff_density_max         0.184
_refine_diff_density_min         -0.181
_refine_diff_density_rms         0.040

#end
